# Supplementary material for: Modern machine learning for tackling inverse problems in chemistry: molecular design to realization
Source: Royal Society of Chemistry journal article supplement (doi:10.1039/d1cc07035e), 2022-01-01
Supplement: d1cc07035e1.pdf [file d1cc07035e1.pdf]

# Supplementary Information for Modern Machine Learning for Tackling Inverse Problems in Chemistry: Molecular Design to Realization

Bhuvanesh Sridharan<sup>†</sup>, Manan Goel<sup>†</sup> and U Deva Priyakumar<sup>†\*</sup>

<sup>†</sup> *Center for Computational Natural Sciences and Bioinformatics, International Institute of Information Technology,  
Hyderabad 500032, India*

\* Email: deva@iiit.ac.in

Table 1: Representative list of publications that have proposed methodologies related to molecular generation

| Title                                                                                                                                                                  | Methods                                                                 | Authors                                       |
|------------------------------------------------------------------------------------------------------------------------------------------------------------------------|-------------------------------------------------------------------------|-----------------------------------------------|
| Automatic chemical design using a data-driven continuous representation of molecules                                                                                   | VAE with RNN Encoder and Decoder                                        | Gómez-Bombarelli <i>et al.</i> <sup>1</sup>   |
| Junction tree variational autoencoder for molecular graph generation                                                                                                   | VAE with Graph Encoder and Decoder                                      | Jin <i>et al.</i> <sup>2</sup>                |
| GraphVAE: Towards Generation of Small Graphs Using Variational Autoencoders                                                                                            | VAE with Graph Encoder and Decoder                                      | Simonovsky and Komodakis <sup>3</sup>         |
| Constrained graph variational autoencoders for molecule design                                                                                                         | VAE with Gated Graph NN Encoder and Decoder                             | Liu <i>et al.</i> <sup>4</sup>                |
| Molecular generative model based on conditional variational autoencoder for de novo molecular design                                                                   | VAE with RNN Encoder and Decoder                                        | Lim <i>et al.</i> <sup>5</sup>                |
| Grammar variational autoencoder                                                                                                                                        | VAE with RNN Encoder and Decoder                                        | Kusner <i>et al.</i> <sup>6</sup>             |
| Learning continuous and data-driven molecular descriptors by translating equivalent chemical representations                                                           | VAE with RNN/CNN Encoder and RNN Decoder                                | Winter <i>et al.</i> <sup>7</sup>             |
| Constrained Bayesian optimization for automatic chemical design using variational autoencoders                                                                         | VAE with RNN Encoder and Decoder with Bayesian Optimization             | Griffiths and Hernández-Lobato <sup>8</sup>   |
| Efficient multi-objective molecular optimization in a continuous latent space                                                                                          | VAE with RNN Encoder and Decoder with Particle Swarm Optimization       | Winter <i>et al.</i> <sup>9</sup>             |
| druGAN: an advanced generative adversarial autoencoder model for de novo generation of new molecules with desired molecular properties in silico                       | Autoencoder with adversarial training                                   | Kadurin <i>et al.</i> <sup>10</sup>           |
| Application of generative autoencoder in de novo molecular design                                                                                                      | Autoencoder with adversarial training followed by Bayesian Optimization | Blaschke <i>et al.</i> <sup>11</sup>          |
| Deep reinforcement learning for de novo drug design                                                                                                                    | RNN with Reinforcement Learning                                         | Popova <i>et al.</i> <sup>12</sup>            |
| MoleGuLAR: Molecule Generation using Reinforcement Learning with Alternating Reward                                                                                    | RNN with Reinforcement Learning                                         | Goel <i>et al.</i> <sup>13</sup>              |
| Objective-reinforced generative adversarial networks (ORGAN) for sequence generation models                                                                            | GAN with Reinforcement Learning                                         | Guimaraes <i>et al.</i> <sup>14</sup>         |
| Optimizing distributions over molecular space. An objective-reinforced generative adversarial network for inverse-design chemistry (ORGANIC)                           | GAN with Reinforcement Learning                                         | Sanchez-Lengeling <i>et al.</i> <sup>15</sup> |
| Reinforced adversarial neural computer for de novo molecular design                                                                                                    | GAN with Reinforcement Learning                                         | Putin <i>et al.</i> <sup>16</sup>             |
| Adversarial threshold neural computer for molecular de novo design                                                                                                     | GAN with Reinforcement Learning                                         | Putin <i>et al.</i> <sup>17</sup>             |
| MolGAN: An implicit generative model for small molecular graphs                                                                                                        | WGAN with Reinforcement Learning                                        | De Cao and Kipf <sup>18</sup>                 |
| Mol-CycleGAN: a generative model for molecular optimization                                                                                                            | GAN with Reinforcement Learning                                         | Maziarka <i>et al.</i> <sup>19</sup>          |
| A de novo molecular generation method using latent vector based generative adversarial network                                                                         | Combination of VAE and GAN                                              | Prykhodko <i>et al.</i> <sup>20</sup>         |
| Graph convolutional policy network for goal-directed molecular graph generation                                                                                        | Graph NN with Reinforcement Learning                                    | You <i>et al.</i> <sup>21</sup>               |
| DeepGraphMolGen, a multi-objective, computational strategy for generating molecules with desirable properties: a graph convolution and reinforcement learning approach | Graph NN with Reinforcement Learning                                    | Khemchandani <i>et al.</i> <sup>22</sup>      |
| Optimization of molecules via deep reinforcement learning                                                                                                              | Graph NN with Reinforcement Learning                                    | Zhou <i>et al.</i> <sup>23</sup>              |

Table 2: Representative list of publications related to application of modern ML methods for mapping retrosynthesis pathways

| Title                                                                                                         | Methods                                     | Authors                               |
|---------------------------------------------------------------------------------------------------------------|---------------------------------------------|---------------------------------------|
| Efficient syntheses of diverse, medically relevant targets planned by computer and executed in the laboratory | Only Reaction Templates                     | Klucznik <i>et al.</i> <sup>24</sup>  |
| Prediction and interpretable visualization of retrosynthetic reactions using graph convolutional networks     | GCN with Reaction Templates                 | Ishida <i>et al.</i> <sup>25</sup>    |
| Deep retrosynthetic reaction prediction using local reactivity and global attention                           | GLN with Reaction Templates                 | Chen and Jung <sup>26</sup>           |
| Planning chemical syntheses with deep neural networks and symbolic AI                                         | MCTS with Reaction Templates                | Segler <i>et al.</i> <sup>27</sup>    |
| Learning retrosynthetic planning through simulated experience                                                 | MCTS with Reaction Templates                | Schreck <i>et al.</i> <sup>28</sup>   |
| AiZynthFinder: a fast, robust and flexible open-source software for retrosynthetic planning                   | MCTS with Reaction Templates                | Genheden <i>et al.</i> <sup>29</sup>  |
| Retro*: Learning Retrosynthetic Planning with Neural Guided A* Search                                         | Best First Search with Reaction Templates   | Chen <i>et al.</i> <sup>30</sup>      |
| Retrosynthetic reaction prediction using neural sequence-to-sequence model                                    | Template Free RNN                           | Liu <i>et al.</i> <sup>31</sup>       |
| A transformer model for retrosynthesis                                                                        | Template Free Transformer                   | Karpov <i>et al.</i> <sup>32</sup>    |
| Predicting retrosynthetic reactions using self-corrected transformer neural networks                          | Template Free Transformer                   | Zheng <i>et al.</i> <sup>33</sup>     |
| Valid, Plausible, and Diverse Retrosynthesis Using Tied Two-Way Transformers with Latent Variables            | Template Free Transformer                   | Kim <i>et al.</i> <sup>34</sup>       |
| Molecular graph enhanced transformer for retrosynthesis prediction                                            | Template Free GNN and Transformer           | Mao <i>et al.</i> <sup>35</sup>       |
| GTA: Graph Truncated Attention for Retrosynthesis                                                             | Template Free GNN with Attention            | Seo <i>et al.</i> <sup>36</sup>       |
| Automatic retrosynthetic route planning using template-free models                                            | Template Free Transformer with MCTS         | Lin <i>et al.</i> <sup>37</sup>       |
| Predicting retrosynthetic pathways using transformer-based models and a hyper-graph exploration strategy      | Template Free Transformer with Beam Search  | Schwaller <i>et al.</i> <sup>38</sup> |
| A graph to graphs framework for retrosynthesis prediction                                                     | Template Free Graph Convolutional Network   | Shi <i>et al.</i> <sup>39</sup>       |
| Learning graph models for template-free retrosynthesis                                                        | Template Free Message Passing Network       | Somnath <i>et al.</i> <sup>40</sup>   |
| Retroxpert: Decompose retrosynthesis prediction like a chemist                                                | Semi-Template Based Graph Attention Network | Yan <i>et al.</i> <sup>41</sup>       |

Table 3: ML based studies that attempted to decipher spectra to molecule inverse problem

| Title                                                                                                                                    | Methods                       | Authors                               |
|------------------------------------------------------------------------------------------------------------------------------------------|-------------------------------|---------------------------------------|
| Chiral Molecular Structure Determination for a Desired Compound Just from Its Molecular Formula and Vibrational Optical Activity Spectra | SVM                           | Wang <i>et al.</i> <sup>42</sup>      |
| Spectral deep learning for prediction and prospective validation of functional groups                                                    | MLP                           | Fine <i>et al.</i> <sup>43</sup>      |
| NMR-TS: de novo molecule identification from NMR spectra                                                                                 | Tree Search, DFT Calculations | Zhang <i>et al.</i> <sup>44</sup>     |
| Deep imitation learning for molecular inverse problems                                                                                   | MLP, GCN                      | Jonas <sup>45</sup>                   |
| Spectra To Structure : Deep Reinforcement Learning for Molecular Inverse Problem                                                         | MCTS, GCN                     | Sridharan <i>et al.</i> <sup>46</sup> |

## References

- [1] R. Gómez-Bombarelli, J. N. Wei, D. Duvenaud, J. M. Hernández-Lobato, B. Sánchez-Lengeling, D. Sheberla, J. Aguilera-Iparraguirre, T. D. Hirzel, R. P. Adams and A. Aspuru-Guzik, *ACS central science*, 2018, **4**, 268–276.
- [2] W. Jin, R. Barzilay and T. Jaakkola, International conference on machine learning, 2018, pp. 2323–2332.
- [3] M. Simonovsky and N. Komodakis, International conference on artificial neural networks, 2018, pp. 412–422.
- [4] Q. Liu, M. Allamanis, M. Brockschmidt and A. L. Gaunt, *arXiv preprint arXiv:1805.09076*, 2018.
- [5] J. Lim, S. Ryu, J. W. Kim and W. Y. Kim, *Journal of cheminformatics*, 2018, **10**, 1–9.
- [6] M. J. Kusner, B. Paige and J. M. Hernández-Lobato, International Conference on Machine Learning, 2017, pp. 1945–1954.
- [7] R. Winter, F. Montanari, F. Noé and D.-A. Clevert, *Chemical science*, 2019, **10**, 1692–1701.
- [8] R.-R. Griffiths and J. M. Hernández-Lobato, *Chemical science*, 2020, **11**, 577–586.
- [9] R. Winter, F. Montanari, A. Steffen, H. Briem, F. Noé and D.-A. Clevert, *Chemical science*, 2019, **10**, 8016–8024.
- [10] A. Kadurin, S. Nikolenko, K. Khrabrov, A. Aliper and A. Zhavoronkov, *Molecular pharmaceuticals*, 2017, **14**, 3098–3104.
- [11] T. Blaschke, M. Olivecrona, O. Engkvist, J. Bajorath and H. Chen, *Molecular informatics*, 2018, **37**, 1700123.
- [12] M. Popova, O. Isayev and A. Tropsha, *Science advances*, 2018, **4**, eaap7885.
- [13] M. Goel, S. Raghunathan, S. Laghuvarapu and U. D. Priyakumar, 2021.
- [14] G. L. Guimaraes, B. Sanchez-Lengeling, C. Outeiral, P. L. C. Farias and A. Aspuru-Guzik, *arXiv preprint arXiv:1705.10843*, 2017.
- [15] B. Sanchez-Lengeling, C. Outeiral, G. L. Guimaraes and A. Aspuru-Guzik, 2017.
- [16] E. Putin, A. Asadulaev, Y. Ivanenkov, V. Aladinskiy, B. Sanchez-Lengeling, A. Aspuru-Guzik and A. Zhavoronkov, *Journal of chemical information and modeling*, 2018, **58**, 1194–1204.
- [17] E. Putin, A. Asadulaev, Q. Vanhaelen, Y. Ivanenkov, A. V. Aladinskaya, A. Aliper and A. Zhavoronkov, *Molecular pharmaceuticals*, 2018, **15**, 4386–4397.
- [18] N. De Cao and T. Kipf, *arXiv preprint arXiv:1805.11973*, 2018.
- [19] Ł. Maziarka, A. Pocha, J. Kaczmarczyk, K. Rataj, T. Danel and M. Warchoń, *Journal of Cheminformatics*, 2020, **12**, 1–18.
- [20] O. Prykhodko, S. V. Johansson, P.-C. Kotsias, J. Arús-Pous, E. J. Bjerrum, O. Engkvist and H. Chen, *Journal of Cheminformatics*, 2019, **11**, 1–13.
- [21] J. You, B. Liu, R. Ying, V. Pande and J. Leskovec, *arXiv preprint arXiv:1806.02473*, 2018.
- [22] Y. Khemchandani, S. O’Hagan, S. Samanta, N. Swainston, T. J. Roberts, D. Bollegala and D. B. Kell, *Journal of cheminformatics*, 2020, **12**, 1–17.
- [23] Z. Zhou, S. Kearnes, L. Li, R. N. Zare and P. Riley, *Scientific reports*, 2019, **9**, 1–10.
- [24] T. Klucznik, B. Mikulak-Klucznik, M. P. McCormack, H. Lima, S. Szymkuć, M. Bhowmick, K. Molga, Y. Zhou, L. Rickershauser, E. P. Gajewska *et al.*, *Chem*, 2018, **4**, 522–532.
- [25] S. Ishida, K. Terayama, R. Kojima, K. Takasu and Y. Okuno, *Journal of chemical information and modeling*, 2019, **59**, 5026–5033.
- [26] S. Chen and Y. Jung, *JACS Au*, 2021, **1**, 1612–1620.
- [27] M. H. Segler, M. Preuss and M. P. Waller, *Nature*, 2018, **555**, 604–610.
- [28] J. S. Schreck, C. W. Coley and K. J. Bishop, *ACS central science*, 2019, **5**, 970–981.
- [29] S. Genheden, A. Thakkar, V. Chadimová, J.-L. Reymond, O. Engkvist and E. Bjerrum, *Journal of cheminformatics*, 2020, **12**, 1–9.
- [30] B. Chen, C. Li, H. Dai and L. Song, Proceedings of the 37th International Conference on Machine Learning, ICML 2020, 13–18 July 2020, Virtual Event, 2020, pp. 1608–1616.

- [31] B. Liu, B. Ramsundar, P. Kawthekar, J. Shi, J. Gomes, Q. Luu Nguyen, S. Ho, J. Sloane, P. Wender and V. Pande, *ACS central science*, 2017, **3**, 1103–1113.
- [32] P. Karpov, G. Godin and I. V. Tetko, International Conference on Artificial Neural Networks, 2019, pp. 817–830.
- [33] S. Zheng, J. Rao, Z. Zhang, J. Xu and Y. Yang, *Journal of Chemical Information and Modeling*, 2019, **60**, 47–55.
- [34] E. Kim, D. Lee, Y. Kwon, M. S. Park and Y.-S. Choi, *Journal of Chemical Information and Modeling*, 2021, **61**, 123–133.
- [35] K. Mao, X. Xiao, T. Xu, Y. Rong, J. Huang and P. Zhao, *Neurocomputing*, 2021, **457**, 193–202.
- [36] S.-W. Seo, Y. Y. Song, J. Y. Yang, S. Bae, H. Lee, J. Shin, S. J. Hwang and E. Yang, Proceedings of the AAAI Conference on Artificial Intelligence, 2021, pp. 531–539.
- [37] K. Lin, Y. Xu, J. Pei and L. Lai, *Chemical Science*, 2020, **11**, 3355–3364.
- [38] P. Schwaller, R. Petraglia, V. Zullo, V. H. Nair, R. A. Haeuselmann, R. Pisoni, C. Bekas, A. Iuliano and T. Laino, *Chemical science*, 2020, **11**, 3316–3325.
- [39] C. Shi, M. Xu, H. Guo, M. Zhang and J. Tang, International Conference on Machine Learning, 2020, pp. 8818–8827.
- [40] V. R. Somnath, C. Bunne, C. W. Coley, A. Krause and R. Barzilay, *arXiv preprint arXiv:2006.07038*, 2020.
- [41] C. Yan, Q. Ding, P. Zhao, S. Zheng, J. Yang, Y. Yu and J. Huang, *arXiv preprint arXiv:2011.02893*, 2020.
- [42] Z. Wang, X. Feng, J. Liu, M. Lu and M. Li, *Microchemical Journal*, 2020, **159**, 105395.
- [43] J. A. Fine, A. A. Rajasekar, K. P. Jethava and G. Chopra, *Chem. Sci.*, 2020, **11**, 4618–4630.
- [44] J. Zhang, K. Terayama, M. Sumita, K. Yoshizoe, K. Ito, J. Kikuchi and K. Tsuda, *Science and Technology of Advanced Materials*, 2020, **21**, 552–561.
- [45] E. Jonas, Advances in Neural Information Processing Systems, 2019.
- [46] B. Sridharan, S. Mehta, Y. Pathak and U. D. Priyakumar, *Unpublished Work*.
